# Supplementary material for: Synthesizing oncogenic signal-processing systems that function as both “signal counters” and “signal blockers” in cancer cells
Source: Royal Society of Chemistry journal article supplement (doi:10.1039/c3mb70093c), 2013-03-25
Supplement: c3mb70093c_3.pdf [file c3mb70093c_3.pdf]

**Supplementary Table1. cDNA sequences of the protein-binding elements used in the vectors.**

---

| Vector Names           | Synthetic Sequences                                                                                                                                      |
|------------------------|----------------------------------------------------------------------------------------------------------------------------------------------------------|
| OSPS-NF-κB             | GCATCCTGAAACTGTTTTAAGGTTGGCCGATGC<br>CAACAACAACAACAAGCATCCTGAAACTGT<br>TTTAAGGTTGGCCGATGC <sup>1</sup>                                                   |
| OSPS-β-catenin         | AGGCCGATCTATGGACGCTATAGGCACACCGGATAC<br>TTTAACGATTGGCTCAACAACAACAACAAGGCC<br>GATCTATGGACGCTATAGGCACACCGGATACTTTAAC<br>GATTGGCT <sup>2</sup>              |
| untargeted-contr<br>ol | TTCTCCGAACGTGTCACGTCACGTTTCAAGAGAACGT<br>GACA<br>CGTTCGGAGAACAACAACAACAACAATTCTCCGAA<br>CGT<br>GTCACGTCACGTTTCAAGAGAACGTGACA<br>CGTTCGGAGAA <sup>3</sup> |

---

Note: Shadowed parts are linkers between the elements.

**References**

- 1 R. Chan , M. Gilbert , K.M. Thompson , H.N. Marsh , D.M. Epstein and P.S. Pendergrast , *Nucleic Acids Res.*, 2006,**34**, e36.
- 2 S.J. Culler , K.G. Hoff and C.D.Smolke , *Science* ,2010,**330**,1251-1255.
- 3 J. Mi , X . Zhang , Y . Liu , S.K. Reddy and Z.N. Rabbani , et al. , *Biochem. Biophys .Res. Commun.*, 2007, **359**, 475-480.
