# Supplementary figures and images for: Synthesizing oncogenic signal-processing systems that function as both “signal counters” and “signal blockers” in cancer cells
Source: Royal Society of Chemistry journal article supplement (doi:10.1039/c3mb70093c), 2013-03-25

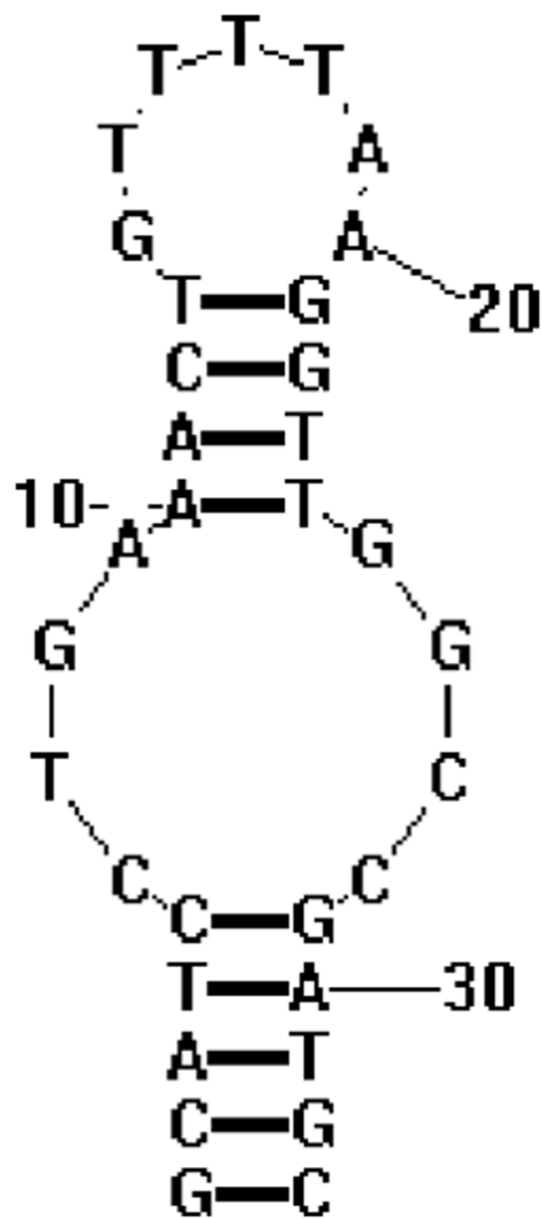

aptamer-NF- $\kappa$  B

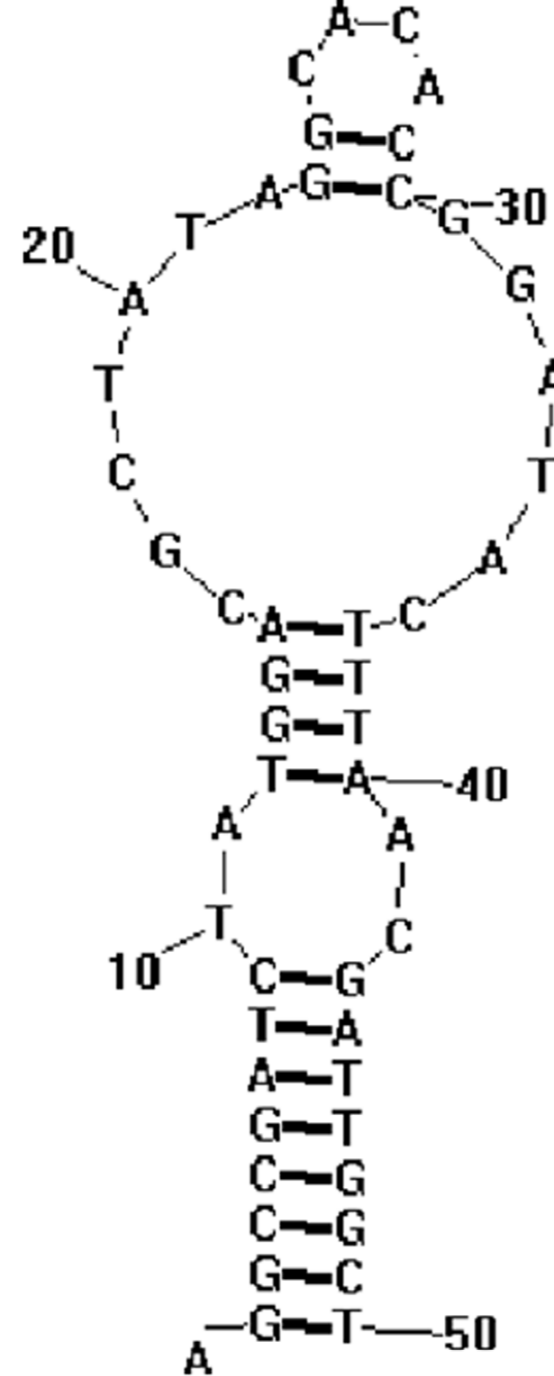

aptamer- $\beta$  -catenin

Supplement: c3mb70093c.pdf [file c3mb70093c.pdf]

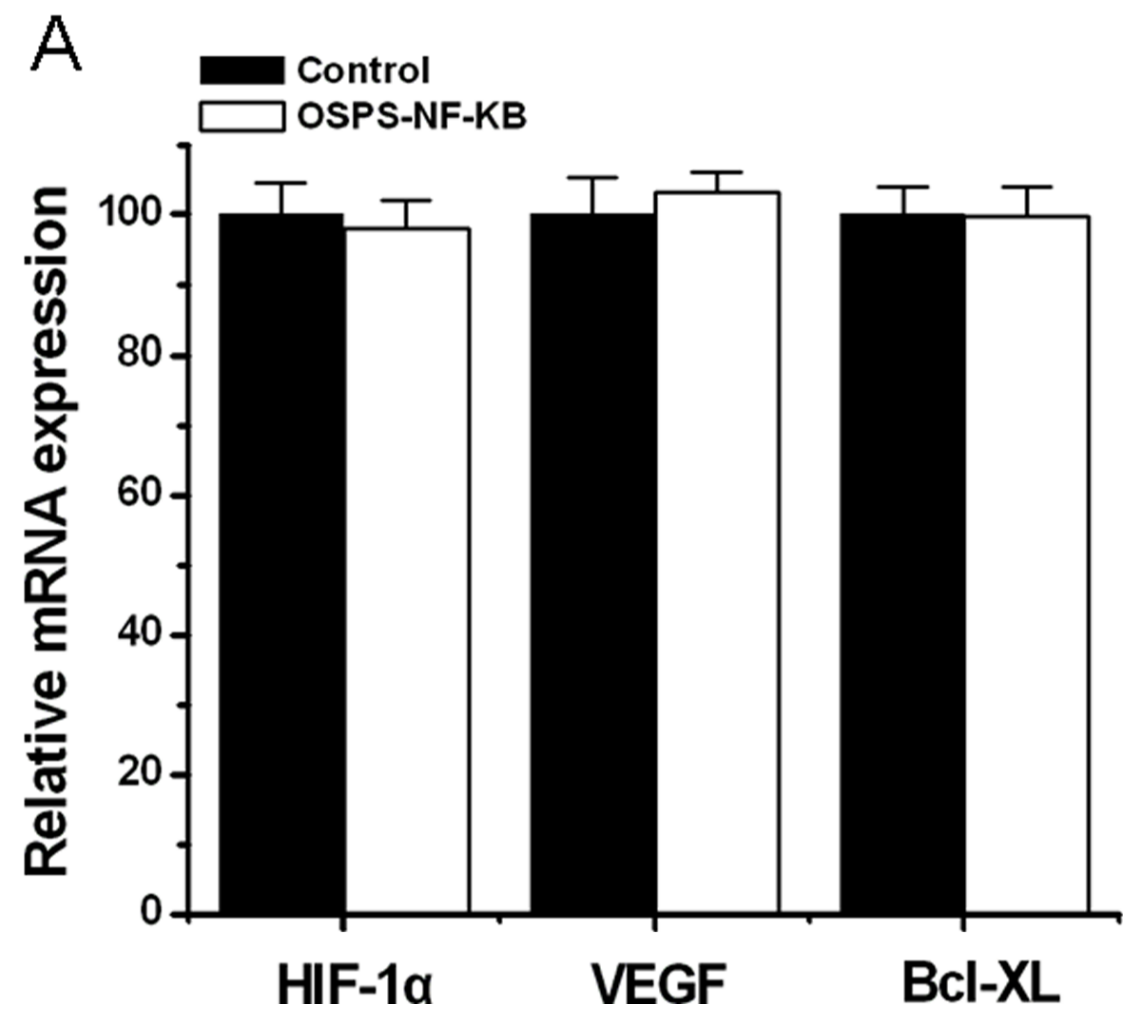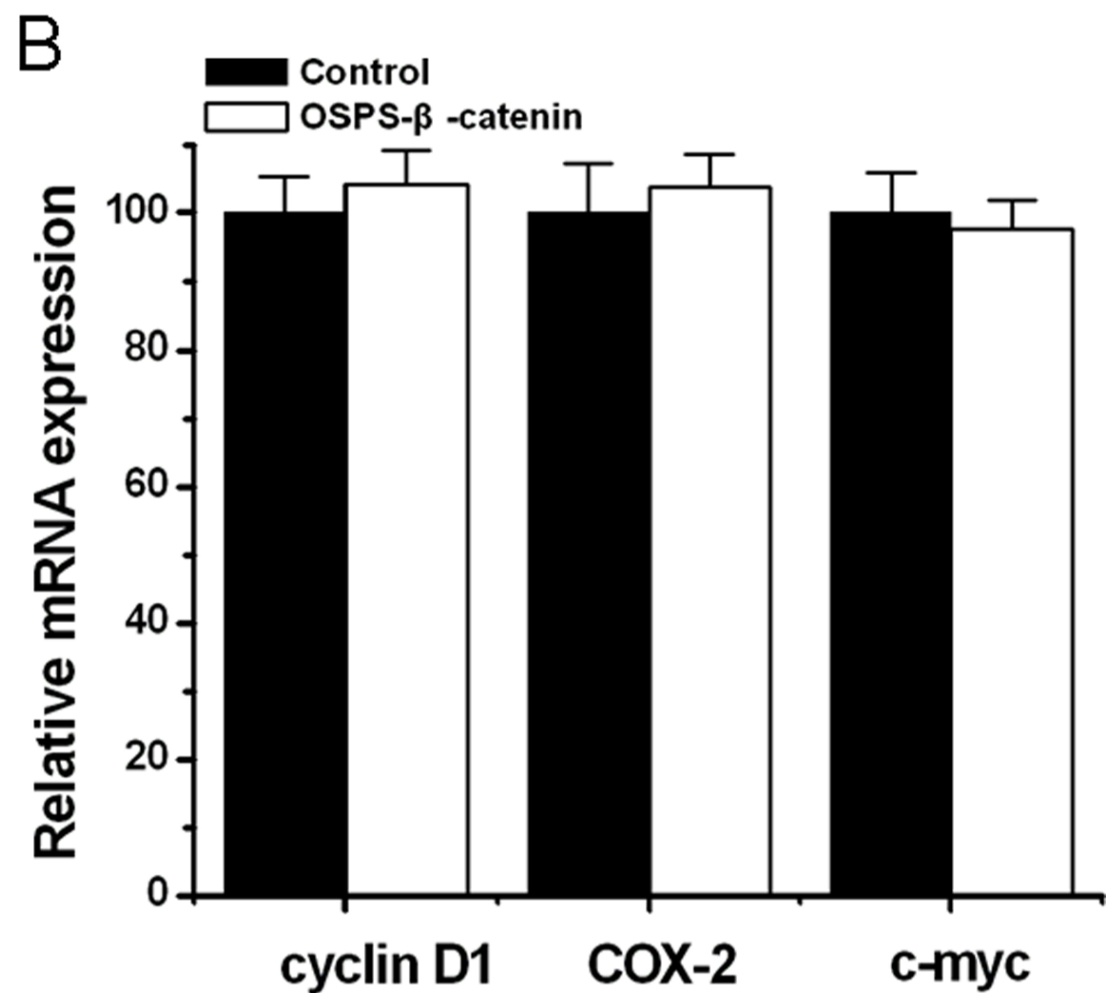

Supplement: c3mb70093c_2.pdf [file c3mb70093c_2.pdf]
